# Supplementary material for: DNA Barcoding Technology Used to Successfully Sub-Classify a Museum Whale Specimen as Balaenoptera edeni edeni
Source: Frontiers journal article supplement (doi:10.3389/fevo.2022.921106), 2022-07-14
Supplement: Table_1.XLSX [file Table_1.XLSX]

## Sheet: Sheet2
Family	Species	ID	Sampling location	Accession No.	References
Balaenopteridae	Balaenoptera edeni	NSMT-33622	Japan	AB201258	Sasaki et al. 2006, Mol. Phylogenet. Evol.
	Balaenoptera edeni	n.s.	India	GQ856370	George et al. 2011, Curr. Sci.
	Balaenoptera edeni	Whale-158- Anchuthengu	India	JN190944	Bijukumar et al. 2011, Unpublished
	Balaenoptera edeni	Be1	India	MT895690	Jeyabaskaran et al. 2020, Unpublished
	Balaenoptera edeni	SR1974	India	MW571086	Biju Kumar et al. 2021, Egypt J Aquat Biol Fish
	Balaenoptera brydei	MPEG	Brazil	MW446661	Silva et al. 2021, Unpublished
	Balaenoptera brydei	n.s.	Northwest Pacific ocean	AP006469	Sasaki et al. 2005, Syst. Biol.
	Balaenoptera borealis	n.s.	Antarctic ocean	AP006470	Sasaki et al. 2005, Syst. Biol.
	Balaenoptera borealis	SEFSC	n.s.	EU496284	Viricel et al. 2012, Mar. Mamm. Sci.
	Balaenoptera borealis	D27	n.s.	MF409248	Arnason et al. 2018, Sci Adv
	Balaenoptera omurai	NSMT	Japan	AB201256	Sasaki et al. 2006, Mol. Phylogenet. Evol.
	Balaenoptera musculus	n.s.	n.s.	X72204	Arnason et al. 1993, Mol. Biol. Evol.
	Balaenoptera musculus	n.s.	n.s.	MF409242	Arnason et al. 2018, Sci Adv
	Megaptera novaeangliae	GOM9049	USA	GQ353285	Jackson et al. 2009, Mol. Biol. Evol.
	Megaptera novaeangliae	FHNB	Argentina	KY001615	Lucero et al. 2016, Unpublished
	Balaenoptera physalus	72991	n.s.	KC572804	Archer et al. 2013, PLoS ONE
	Balaenoptera physalus	UAM	USA	EU139272	Zhang et al. 2007, Unpublished
	Balaenoptera bonaerensis	n.s.	Atlantic Ocean	LC106302	Sumida et al. 2015, Sci Rep
	Balaenoptera acutorostrata	Ba080210	France	KF281608	Alfonsi et al. 2013, Zookeys
	Balaenoptera acutorostrata	n.s.	n.s.	AJ554054	Arnason et al. 2004, Gene
Eschrichtiidae	Eschrichtius robustus	n.s.	n.s.	JF442784	Jarrell et al. 2011, Unpublished
	Eschrichtius robustus	KOGW264	Russia	MH047022	Efimova et al. 2018, Unpublished
Neobalaenidae	Caperea marginata	n.s.	n.s.	AJ554052	Arnason et al. 2004, Gene
	Caperea marginata	n.s.	New Zealand	AP006475	Sasaki et al. 2005, Syst. Biol.
Balaenidae	Eubalaena glacialis	n.s.	USA	MF459656	Allwood et al. 2017, Conserv Genet Resour
	Balaena mysticetus	n.s.	Okhotsk Sea	AP006472	Sasaki et al. 2005, Syst. Biol.
