# Supplementary material for: DNA Barcoding Technology Used to Successfully Sub-Classify a Museum Whale Specimen as Balaenoptera edeni edeni
Source: Frontiers journal article supplement (doi:10.3389/fevo.2022.921106), 2022-07-14
Supplement: Table_2.XLSX [file Table_2.XLSX]

## Sheet: Sheet1
	1	2	3	4	5	6	7	8	9	10	11	12	13	14	15	16	17	18	19	20	21	22	23	24	25	26	27
New obtained sequence
B. edeni NSMT-33622	0
B. edeni	0	0
B. edeni Whale-158	0.0023629	0.0023629	0.0023629
B. edeni Be1	0.0023629	0.0023629	0.0023629	0.00473552
B. edeni SR1974	0.0023629	0.0023629	0.0023629	0	0.00473552
B. brydei MPEG	0.0394175	0.0394175	0.0394175	0.0419716	0.0419716	0.0419716
B. brydei	0.0393454	0.0393454	0.0393454	0.0418946	0.0418946	0.0418946	0.0047437
B. borealis	0.041839	0.041839	0.041839	0.0443956	0.0443956	0.0443956	0.0524957	0.0472007
B. borealis SEFSC	0.0316645	0.0316645	0.0316645	0.0341729	0.0341729	0.0341729	0.0473765	0.0421265	0.00952675
B. borealis D27	0.0316645	0.0316645	0.0316645	0.0341729	0.0341729	0.0341729	0.0473765	0.0421265	0.00952675	0
B. omurai NSMT	0.0822086	0.0822086	0.0822086	0.0849696	0.0794599	0.0849696	0.0968646	0.0910243	0.0799282	0.0742875	0.0742875
B. musculus	0.0903963	0.0903963	0.0903963	0.087615	0.0931902	0.087615	0.0967196	0.0908898	0.0683602	0.0710499	0.0710499	0.0885272
B. musculus	0.087615	0.087615	0.087615	0.0848462	0.0903963	0.0848462	0.0938889	0.0880912	0.0656823	0.0683602	0.0683602	0.0857255	0.0023629
M. novaeangliae GOM9049	0.0906222	0.0906222	0.0906222	0.0934238	0.0878332	0.0934238	0.0996147	0.0937494	0.0762091	0.0763565	0.0763565	0.0887502	0.0990652	0.0962381
M. novaeangliae FHNB	0.0934238	0.0934238	0.0934238	0.0962381	0.0906222	0.0962381	0.102473	0.0965751	0.0789247	0.079078	0.079078	0.0972568	0.101905	0.0990652	0.00711794
B. physalus 72991	0.0850132	0.0850132	0.0850132	0.0850132	0.0822507	0.0850132	0.0999673	0.0940775	0.0713242	0.0711868	0.0711868	0.0887042	0.0959967	0.0931902	0.0686582	0.0713608
B. physalus UAM	0.0963815	0.0963815	0.0963815	0.0963815	0.0935622	0.0963815	0.111759	0.105721	0.0824123	0.0822507	0.0822507	0.100271	0.107569	0.104704	0.0742194	0.0769521	0.00952675
B. bonaerensis	0.0963815	0.0963815	0.0963815	0.0992136	0.0935622	0.0992136	0.0930529	0.0932379	0.0820898	0.0877881	0.0877881	0.0945498	0.0959967	0.0931902	0.0793863	0.0821318	0.0766139	0.0877881
B. acutorostrata Ba080210	0.102681	0.102681	0.102681	0.10556	0.0998165	0.10556	0.0992647	0.099465	0.0994137	0.0939374	0.0939374	0.104002	0.114274	0.111356	0.0966249	0.099465	0.0994137	0.105344	0.0342969
B. acutorostrata	0.0940775	0.0940775	0.0940775	0.0969146	0.0912534	0.0969146	0.0937494	0.0939374	0.0938889	0.0854743	0.0854743	0.0952706	0.110729	0.107843	0.0967695	0.0996147	0.0965253	0.10242	0.0394175	0.00955525
E. robustus	0.103629	0.103629	0.103629	0.106538	0.100733	0.106538	0.103788	0.103575	0.103416	0.0978515	0.0978515	0.10748	0.115108	0.112164	0.0944571	0.0973073	0.100528	0.109461	0.0945989	0.0947906	0.0949335
E. robustus KOGW264	0.103629	0.103629	0.103629	0.106538	0.100733	0.106538	0.103788	0.103575	0.103416	0.0978515	0.0978515	0.10748	0.115108	0.112164	0.0944571	0.0973073	0.100528	0.109461	0.0945989	0.0947906	0.0949335	0
C. marginata	0.132005	0.132005	0.132005	0.135019	0.135019	0.135019	0.12053	0.120278	0.128463	0.128734	0.128734	0.152051	0.141856	0.138794	0.117329	0.120278	0.151131	0.157737	0.14155	0.148025	0.148271	0.13123	0.13123
C. marginata	0.129005	0.129005	0.129005	0.132005	0.132005	0.132005	0.117573	0.117329	0.125492	0.125755	0.125755	0.155196	0.144933	0.141856	0.114393	0.117329	0.148025	0.154593	0.138496	0.144933	0.145173	0.128183	0.128183	0.0023629
E. glacialis	0.10513	0.10513	0.10513	0.108008	0.108008	0.108008	0.123565	0.117389	0.0994137	0.102473	0.102473	0.123958	0.133065	0.130037	0.123565	0.126552	0.124023	0.130314	0.123761	0.12053	0.127226	0.106868	0.106868	0.106263	0.109178
B. mysticetus	0.0961887	0.0961887	0.0961887	0.0990144	0.0990144	0.0990144	0.11469	0.108618	0.0961887	0.0931902	0.0931902	0.120468	0.12622	0.123242	0.108395	0.105505	0.0968646	0.102784	0.102784	0.111701	0.108728	0.0922182	0.0922182	0.102941	0.100067	0.0317217
