# Supplementary material for: DNA Barcoding Technology Used to Successfully Sub-Classify a Museum Whale Specimen as Balaenoptera edeni edeni
Source: Frontiers journal article supplement (doi:10.3389/fevo.2022.921106), 2022-07-14
Supplement: Table_3.XLSX [file Table_3.XLSX]

## Sheet: Sheet4
Clade	COI	References
Balaenoptera edeni	GQ856370	George et al. 2011, Curr. Sci.
Balaenoptera edeni	AB201258	Sasaki et al. 2006, Mol. Phylogenet. Evol.
Balaenoptera edeni	JN190945	Bijukumar et al. 2011, Unpublished
Balaenoptera edeni	JN190944	Bijukumar et al. 2011, Unpublished
Balaenoptera edeni	MT895692	Jeyabaskaran et al. 2020, Unpublished
Balaenoptera edeni	MT895691	Jeyabaskaran et al. 2020, Unpublished
Balaenoptera edeni	MT895690	Jeyabaskaran et al. 2020, Unpublished
Balaenoptera edeni	EU496283	Viricel et al. 2012, Mar. Mamm. Sci.
Balaenoptera edeni	NC_007938	Sasaki et al. 2006, Mol. Phylogenet. Evol.
Balaenoptera brydei	AP006469	Sasaki et al. 2005, Syst. Biol.
Balaenoptera brydei	AB201259	Sasaki et al. 2006, Mol. Phylogenet. Evol.
Balaenoptera brydei	MH638371	Efimova et al. 2018, Unpublished
Balaenoptera brydei	MW446727	Silva et al. 2021, Unpublished
Balaenoptera brydei	MW446726	Silva et al. 2021, Unpublished
Balaenoptera brydei	MW446679	Silva et al. 2021, Unpublished
Balaenoptera brydei	MW446674	Silva et al. 2021, Unpublished
Balaenoptera brydei	MW446661	Silva et al. 2021, Unpublished
Balaenoptera brydei	MW446669	Silva et al. 2021, Unpublished
Balaenoptera brydei	NC_006928	Sasaki et al. 2005, Syst. Biol.
Balaenoptera borealis	AP006470	Sasaki et al. 2005, Syst. Biol.
Balaenoptera borealis	MW446657	Silva et al. 2021, Unpublished
Balaenoptera borealis	MW446656	Silva et al. 2021, Unpublished
Balaenoptera borealis	MF409249	Arnason et al. 2018, Sci Adv
Balaenoptera borealis	MF409248	Arnason et al. 2018, Sci Adv
Balaenoptera borealis	EU496284	Viricel et al. 2012, Mar. Mamm. Sci.
Balaenoptera borealis	NC_006929	Sasaki et al. 2005, Syst. Biol.
Balaenoptera omurai	AB201256	Sasaki et al. 2006, Mol. Phylogenet. Evol.
Balaenoptera omurai	AB201257	Sasaki et al. 2006, Mol. Phylogenet. Evol.
Balaenoptera omurai	MK676070	Zhao et al. 2019, Unpublished
Balaenoptera omurai	NC_007937	Sasaki et al. 2006, Mol. Phylogenet. Evol.
